# Supplementary material
Source: publisher figshare collection journal article supplement (https://acs.figshare.com/ndownloader/files/4634707)
Supplement: Supplementary file 1 [file 4634707]

# Liquid Phase Adsorption by Microporous Coordination Polymers: Removal of Organosulfur Compounds

*Katie A. Cychosz, Antek G. Wong-Foy, Adam J. Matzger\**

Department of Chemistry and the Macromolecular Science and Engineering Program, University of Michigan, 930 N. University Ave., Ann Arbor, MI 48109-1055

\*Author to whom correspondence may be addressed: matzger@umich.edu

## **SUPPORTING INFORMATION**

### **Contents**

- I. MCP activation procedures**
- II. Materials and Methods**
- III. Batch adsorption procedure**
- IV. Regeneration Experiment**
- V. MCP surface areas and pore volumes**
- VI. Kinetic Diameters**
- VII. Adsorption isotherm data tables**

## I. MCP Activation Procedures

MOF-5, MOF-177: Millward, A.R.; Yaghi, O.M. *J. Am. Chem. Soc.* **2005**, *127*, 17998-17999.

HKUST-1: Rowsell, J.L.C.; Yaghi, O.M. *J. Am. Chem. Soc.* **2006**, *128*, 1304-1315.

MOF-505: Chen, B.; Ockwig, N.W.; Millward, A.R.; Contreras, D.S.; Yaghi, O.M. *Angew. Chem. Int. Ed.* **2005**, *44*, 4745-4749.

UMCM-150: Wong-Foy, A.G.; Lebel, O.; Matzger, A.J. *J. Am. Chem. Soc.* **2007**, *129*, 15740-15741.

## II. Materials and Methods

Benzothiophene, (97 %, Acros), dibenzothiophene (99%, Acros), 4,6-dimethyldibenzothiophene (97%, Aldrich), and isooctane (HPLC grade, Fisher) were used as received. Na(Y) zeolite (powder) was obtained from Strem Chemicals and used as received. Sulfur concentrations were determined using a Shimadzu GC-2010 equipped with a capillary column (L = 15 m, ID = 0.25 mm) and outfitted with both a flame ionization detector (FID) and flame photometric detector (FPD). Isotherm capacities were determined using the FID detector and were calibrated using control solutions of known sulfur concentration.

## III. Batch Adsorption Procedure

In a typical experiment, ~10, 15, and 20 mg (precisely weighed) of MCP were added to three GC vials. Isooctane (500  $\mu$ L) was added to each vial. Aliquots (20.0, 50.0, 100, 250, and 500  $\mu$ L) of 3000 ppmw S benzothiophene or dibenzothiophene in isooctane, or 1000 ppmw S 4,6-dimethyldibenzothiophene in isooctane were added sequentially. Between aliquots, the vials were agitated on a shaker for 2 hours (benzothiophene), 3.5 hours (dibenzothiophene), or 12 hours (4,6-dimethyldibenzothiophene) and then analyzed by GC. Equilibration times were determined for each organosulfur compound by monitoring (GC) the concentration change until no further changes in the adsorption capacity were observed.

#### IV. Regeneration Experiment

UMCM-150 was added to a GC vial. DBT (1 mL, 3000 ppmw S) in isoctane was added to the solid. The vial was agitated on a shaker overnight. The DBT solution was removed and the UMCM-150 was rinsed with isoctane ( $6 \times 20$  mL) over a 24 hour period to remove adsorbed DBT. The isoctane solution was removed and the regenerated UMCM-150 was used to plot an isotherm using the batch adsorption procedure given in Section III. The results are shown below.

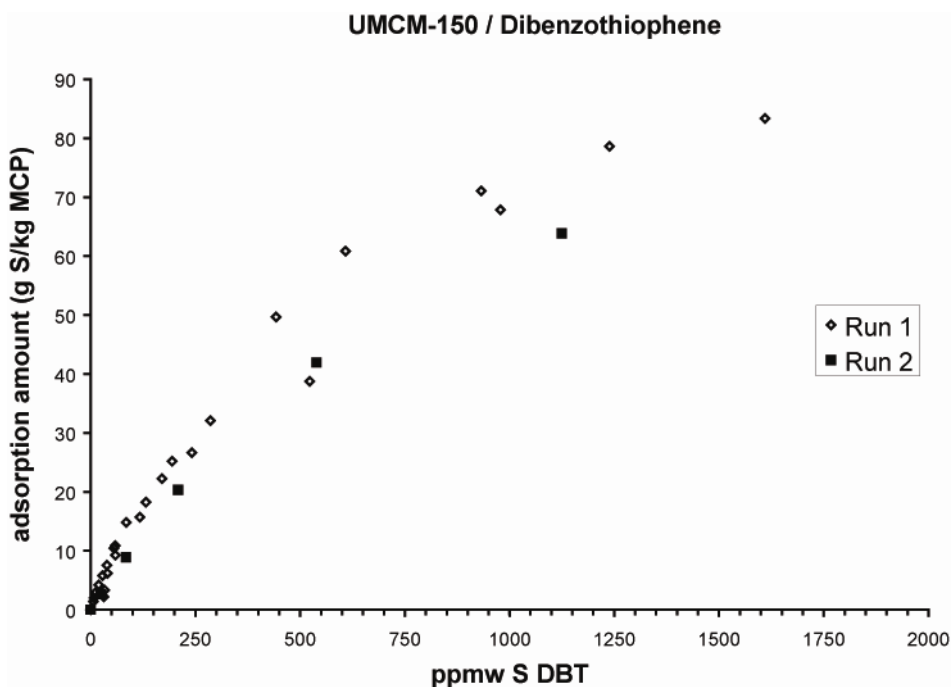

## V. MCP Surface Areas and Pore Volumes

Table S1.

| MCP      | Langmuir Surface Area (m <sup>2</sup> /g) | Pore Volume (cm <sup>3</sup> /g) <sup>a</sup> |
|----------|-------------------------------------------|-----------------------------------------------|
| UMCM-150 | 3100 <sup>b</sup>                         | 1.11                                          |
| MOF-505  | 1830 <sup>c</sup>                         | 0.71                                          |
| HKUST-1  | 2260 <sup>d</sup>                         | 0.79                                          |
| MOF-5    | 4170 <sup>d</sup>                         | 1.31                                          |
| MOF-177  | 5640 <sup>d</sup>                         | 1.86                                          |

a) Pore volumes were calculated using the SOLV routine in PLATON (v. 1.10, University of Glasgow, 2006). The default probe radius of 1.2 Å was used with a grid spacing of 0.2 Å. All solvent molecules (bound and free) were removed from the structure generated from the published CIF files prior to use of the SOLV routine. For UMCM-150 and MOF-177, disorder in the structures was not removed as it did not appreciably affect the pore volume.

b) Wong-Foy, A.G.; Lebel, O.; Matzger, A.J. *J. Am. Chem. Soc.* **2007**, *129*, 15740-15741.

c) Chen, B.; Ockwig, N.W.; Millward, A.R.; Contreras, D.S.; Yaghi, O.M. *Angew. Chem. Int. Ed.* **2005**, *44*, 4745-4749.

d) Wong-Foy, A.G.; Matzger, A.J.; Yaghi, O.M. *J. Am. Chem. Soc.* **2006**, *128*, 3494-3495.

## VI. Kinetic Diameters

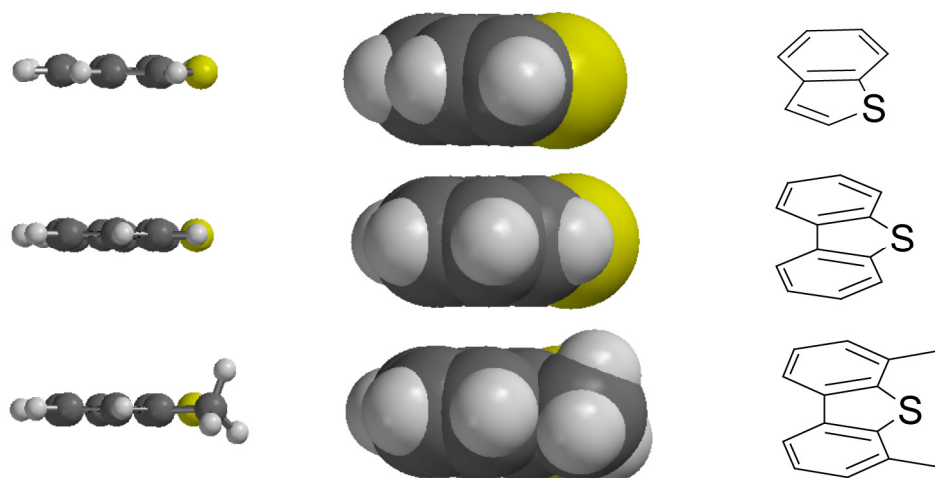

**Figure S1.** Kinetic diameters were approximated using the minimum cross-sectional area and were found to be 5.45 Å for benzothiophene (top), 5.54 Å for dibenzothiophene (middle), and 5.97 Å for 4,6-dimethyldibenzothiophene (bottom).

## VII. Adsorption Isotherm Data Tables

(a) MOF-177

|              | <b>concentration</b><br><i>(ppmw S)</i> | <b>adsorption amount</b><br><i>(g S/kg sorbent)</i> |
|--------------|-----------------------------------------|-----------------------------------------------------|
| <b>BT</b>    | 0.00                                    | 0.00                                                |
|              | 103.62                                  | 0.41                                                |
|              | 107.04                                  | 0.42                                                |
|              | 108.64                                  | 0.77                                                |
|              | 332.19                                  | 1.38                                                |
|              | 341.44                                  | 1.50                                                |
|              | 354.86                                  | 1.69                                                |
|              | 675.86                                  | 3.82                                                |
|              | 700.76                                  | 3.94                                                |
|              | 729.12                                  | 4.70                                                |
|              | 1259.09                                 | 6.79                                                |
|              | 1305.45                                 | 5.73                                                |
|              | 1326.62                                 | 8.65                                                |
|              | 1851.00                                 | 8.79                                                |
|              | 1880.07                                 | 8.78                                                |
| 1917.17      | 8.23                                    |                                                     |
| <b>DBT</b>   | 0.00                                    | 0.00                                                |
|              | 89.28                                   | 0.86                                                |
|              | 90.42                                   | 0.91                                                |
|              | 101.44                                  | 0.86                                                |
|              | 288.36                                  | 2.89                                                |
|              | 289.53                                  | 3.15                                                |
|              | 333.72                                  | 2.36                                                |
|              | 614.70                                  | 6.22                                                |
|              | 620.69                                  | 6.60                                                |
|              | 680.59                                  | 6.43                                                |
|              | 1172.94                                 | 11.45                                               |
|              | 1176.13                                 | 12.48                                               |
|              | 1266.18                                 | 11.33                                               |
|              | 1739.66                                 | 18.34                                               |
|              | 1755.58                                 | 18.73                                               |
| 1851.52      | 15.58                                   |                                                     |
| <b>DMDBT</b> | 0.00                                    | 0.00                                                |
|              | 27.64                                   | 0.28                                                |
|              | 30.77                                   | 0.31                                                |
|              | 34.65                                   | 0.39                                                |
|              | 89.51                                   | 0.94                                                |
|              | 98.68                                   | 1.06                                                |
|              | 110.66                                  | 1.36                                                |
|              | 192.69                                  | 2.03                                                |
|              | 210.40                                  | 2.24                                                |
|              | 235.32                                  | 2.43                                                |
|              | 369.32                                  | 3.99                                                |
|              | 392.31                                  | 4.55                                                |
|              | 427.85                                  | 5.20                                                |
|              | 559.17                                  | 6.26                                                |
|              | 591.85                                  | 6.13                                                |
| 616.78       | 8.70                                    |                                                     |

## (b) MOF-5

|              | <b>concentration</b><br><i>(ppmw S)</i> | <b>adsorption amount</b><br><i>(g S/kg sorbent)</i> |
|--------------|-----------------------------------------|-----------------------------------------------------|
| <b>BT</b>    | 0.00                                    | 0.00                                                |
|              | 76.10                                   | 0.55                                                |
|              | 79.13                                   | 0.72                                                |
|              | 94.72                                   | 0.76                                                |
|              | 249.77                                  | 1.81                                                |
|              | 260.16                                  | 2.36                                                |
|              | 305.15                                  | 2.56                                                |
|              | 533.49                                  | 4.07                                                |
|              | 552.49                                  | 5.34                                                |
|              | 642.40                                  | 5.65                                                |
|              | 1051.06                                 | 7.82                                                |
|              | 1093.03                                 | 9.72                                                |
|              | 1187.12                                 | 11.90                                               |
|              | 1621.40                                 | 12.21                                               |
|              | 1656.69                                 | 15.56                                               |
| 1780.94      | 16.39                                   |                                                     |
| <b>DBT</b>   | 0.00                                    | 0.00                                                |
|              | 28.54                                   | 0.97                                                |
|              | 41.05                                   | 1.32                                                |
|              | 60.66                                   | 1.94                                                |
|              | 102.02                                  | 3.25                                                |
|              | 142.22                                  | 4.40                                                |
|              | 209.12                                  | 6.20                                                |
|              | 242.88                                  | 7.44                                                |
|              | 335.27                                  | 9.74                                                |
|              | 474.98                                  | 13.10                                               |
|              | 603.97                                  | 15.09                                               |
|              | 782.19                                  | 18.45                                               |
|              | 1003.53                                 | 23.01                                               |
|              | 1158.32                                 | 23.89                                               |
|              | 1360.76                                 | 28.25                                               |
| 1589.36      | 34.37                                   |                                                     |
| <b>DMDBT</b> | 0.00                                    | 0.00                                                |
|              | 5.15                                    | 0.27                                                |
|              | 9.15                                    | 0.51                                                |
|              | 14.29                                   | 0.90                                                |
|              | 19.40                                   | 0.92                                                |
|              | 31.65                                   | 1.74                                                |
|              | 38.15                                   | 2.26                                                |
|              | 49.92                                   | 2.97                                                |
|              | 72.55                                   | 4.06                                                |
|              | 93.38                                   | 5.24                                                |
|              | 117.44                                  | 6.53                                                |
|              | 174.31                                  | 8.69                                                |
|              | 200.30                                  | 9.97                                                |
| 262.36       | 12.77                                   |                                                     |
| 334.77       | 14.88                                   |                                                     |

## (c) HKUST-1

|              | <b>concentration</b><br><i>(ppmw S)</i> | <b>adsorption amount</b><br><i>(g S/kg sorbent)</i> |
|--------------|-----------------------------------------|-----------------------------------------------------|
| <b>BT</b>    | 0.00                                    | 0.00                                                |
|              | 37.81                                   | 1.02                                                |
|              | 42.38                                   | 1.21                                                |
|              | 52.06                                   | 1.57                                                |
|              | 133.97                                  | 3.38                                                |
|              | 151.32                                  | 3.95                                                |
|              | 192.90                                  | 4.76                                                |
|              | 319.63                                  | 7.48                                                |
|              | 356.92                                  | 8.65                                                |
|              | 463.22                                  | 9.49                                                |
|              | 775.53                                  | 13.83                                               |
|              | 842.00                                  | 15.50                                               |
|              | 972.59                                  | 17.36                                               |
|              | 1363.25                                 | 20.85                                               |
|              | 1461.21                                 | 21.87                                               |
| 1489.98      | 30.63                                   |                                                     |
| <b>DBT</b>   | 0.00                                    | 0.00                                                |
|              | 10.01                                   | 1.46                                                |
|              | 13.47                                   | 2.02                                                |
|              | 18.01                                   | 3.59                                                |
|              | 42.07                                   | 4.97                                                |
|              | 49.19                                   | 6.95                                                |
|              | 81.13                                   | 11.61                                               |
|              | 100.77                                  | 11.81                                               |
|              | 138.74                                  | 15.93                                               |
|              | 252.97                                  | 24.15                                               |
|              | 323.72                                  | 25.68                                               |
|              | 491.52                                  | 30.85                                               |
|              | 784.86                                  | 38.15                                               |
|              | 892.09                                  | 39.86                                               |
|              | 1131.23                                 | 44.06                                               |
| 1515.05      | 43.17                                   |                                                     |
| <b>DMDBT</b> | 0.00                                    | 0.00                                                |
|              | 2.34                                    | 0.43                                                |
|              | 2.61                                    | 0.61                                                |
|              | 2.76                                    | 0.96                                                |
|              | 5.54                                    | 3.81                                                |
|              | 7.38                                    | 1.51                                                |
|              | 9.02                                    | 2.12                                                |
|              | 9.25                                    | 5.34                                                |
|              | 14.31                                   | 3.18                                                |
|              | 21.76                                   | 8.00                                                |
|              | 27.08                                   | 9.04                                                |
|              | 79.73                                   | 11.31                                               |
|              | 146.37                                  | 14.69                                               |
|              | 229.45                                  | 13.60                                               |
|              | 371.66                                  | 12.80                                               |
| 400.70       | 18.07                                   |                                                     |



## (d) UMCM-150

|              | <b>concentration</b><br><i>(ppmw S)</i> | <b>adsorption amount</b><br><i>(g S/kg sorbent)</i> |
|--------------|-----------------------------------------|-----------------------------------------------------|
| <b>BT</b>    | 0.00                                    | 0.00                                                |
|              | 22.72                                   | 1.81                                                |
|              | 27.07                                   | 2.25                                                |
|              | 43.41                                   | 3.18                                                |
|              | 99.94                                   | 5.74                                                |
|              | 121.35                                  | 6.91                                                |
|              | 165.84                                  | 9.80                                                |
|              | 275.47                                  | 12.20                                               |
|              | 317.29                                  | 14.58                                               |
|              | 415.68                                  | 19.65                                               |
|              | 709.82                                  | 22.75                                               |
|              | 811.81                                  | 25.16                                               |
|              | 954.01                                  | 32.45                                               |
|              | 1240.08                                 | 37.45                                               |
|              | 1406.26                                 | 37.42                                               |
| 1591.26      | 42.48                                   |                                                     |
| <b>DBT</b>   | 0.00                                    | 0.00                                                |
|              | 6.26                                    | 1.41                                                |
|              | 8.47                                    | 1.99                                                |
|              | 11.44                                   | 2.85                                                |
|              | 19.49                                   | 4.20                                                |
|              | 28.54                                   | 5.81                                                |
|              | 31.69                                   | 2.18                                                |
|              | 33.43                                   | 3.31                                                |
|              | 39.13                                   | 7.56                                                |
|              | 39.74                                   | 6.20                                                |
|              | 55.54                                   | 10.41                                               |
|              | 58.65                                   | 10.86                                               |
|              | 59.10                                   | 9.24                                                |
|              | 84.85                                   | 14.81                                               |
|              | 117.58                                  | 15.71                                               |
|              | 132.02                                  | 18.25                                               |
|              | 170.18                                  | 22.26                                               |
|              | 194.76                                  | 25.19                                               |
|              | 241.16                                  | 26.64                                               |
|              | 285.69                                  | 32.10                                               |
| 442.99       | 49.68                                   |                                                     |
| 523.23       | 38.77                                   |                                                     |
| 608.47       | 60.84                                   |                                                     |
| 932.53       | 71.09                                   |                                                     |
| 978.33       | 67.84                                   |                                                     |
| 1238.44      | 78.62                                   |                                                     |
| 1609.47      | 83.35                                   |                                                     |
| <b>DMDBT</b> | 0.00                                    | 0.00                                                |
|              | 1.44                                    | 0.87                                                |
|              | 1.95                                    | 1.29                                                |
|              | 2.73                                    | 2.31                                                |
|              | 8.03                                    | 2.97                                                |
|              | 9.39                                    | 4.39                                                |
|              | 10.95                                   | 7.92                                                |
|              | 11.86                                   | 7.36                                                |
|              | 15.73                                   | 10.82                                               |
|              | 31.23                                   | 17.78                                               |
|              | 38.00                                   | 17.95                                               |
|              | 67.68                                   | 24.27                                               |
|              | 145.01                                  | 32.45                                               |
|              | 175.26                                  | 32.14                                               |
| 265.39       | 36.86                                   |                                                     |
| 423.79       | 39.53                                   |                                                     |

## (e) MOF-505

|              | <b>concentration</b><br><i>(ppmw S)</i> | <b>adsorption amount</b><br><i>(g S/kg sorbent)</i> |
|--------------|-----------------------------------------|-----------------------------------------------------|
| <b>BT</b>    | 0.00                                    | 0.00                                                |
|              | 6.78                                    | 1.35                                                |
|              | 6.83                                    | 3.20                                                |
|              | 7.53                                    | 1.71                                                |
|              | 25.88                                   | 5.95                                                |
|              | 28.27                                   | 4.65                                                |
|              | 43.29                                   | 10.49                                               |
|              | 93.36                                   | 10.73                                               |
|              | 94.54                                   | 13.62                                               |
|              | 164.39                                  | 22.63                                               |
|              | 324.56                                  | 23.06                                               |
|              | 360.64                                  | 28.30                                               |
|              | 614.13                                  | 39.34                                               |
|              | 719.51                                  | 41.69                                               |
|              | 942.58                                  | 43.34                                               |
| 1284.94      | 52.95                                   |                                                     |
| <b>DBT</b>   | 0.00                                    | 0.00                                                |
|              | 0.00                                    | 1.22                                                |
|              | 0.00                                    | 0.84                                                |
|              | 0.00                                    | 1.67                                                |
|              | 1.10                                    | 2.42                                                |
|              | 1.12                                    | 3.74                                                |
|              | 1.25                                    | 5.83                                                |
|              | 1.61                                    | 5.45                                                |
|              | 1.63                                    | 8.50                                                |
|              | 2.23                                    | 5.43                                                |
|              | 2.71                                    | 2.64                                                |
|              | 4.84                                    | 19.11                                               |
|              | 7.40                                    | 14.06                                               |
|              | 7.42                                    | 12.08                                               |
|              | 28.21                                   | 19.96                                               |
|              | 160.29                                  | 37.13                                               |
|              | 258.15                                  | 28.47                                               |
|              | 535.75                                  | 31.18                                               |
| 885.40       | 41.85                                   |                                                     |
| 915.02       | 38.57                                   |                                                     |
| 1181.06      | 44.01                                   |                                                     |
| 1582.46      | 47.30                                   |                                                     |
| <b>DMDBT</b> | 0.00                                    | 0.00                                                |
|              | 0.62                                    | 0.65                                                |
|              | 0.83                                    | 1.75                                                |
|              | 0.85                                    | 0.75                                                |
|              | 3.85                                    | 5.54                                                |
|              | 4.41                                    | 2.23                                                |
|              | 4.60                                    | 6.39                                                |
|              | 5.40                                    | 2.56                                                |
|              | 6.51                                    | 5.92                                                |
|              | 11.58                                   | 13.54                                               |
|              | 13.57                                   | 14.37                                               |
|              | 14.34                                   | 15.58                                               |
|              | 113.90                                  | 25.08                                               |
|              | 150.20                                  | 25.17                                               |
|              | 188.46                                  | 24.99                                               |
| 447.52       | 25.41                                   |                                                     |
